# Supplementary material for: Copper catalysis at operando conditions—bridging the gap between single nanoparticle probing and catalyst-bed-averaging
Source: PubMed Central journal article supplement (PMC7518423; doi:10.1038/s41467-020-18623-1), 2020-09-24
Supplement: 41467_2020_18623_MOESM3_ESM.pdf [file 41467_2020_18623_MOESM3_ESM.pdf]

## Description of Additional Supplementary Files

File Name: Supplementary Movie 1

Description: Change in scattering intensity for all ten patches in the plug-flow reactor. The first and second row correspond to patch 1-5 and 6-10 in Figure 2b, respectively. Color scale corresponds to scattering intensity difference compared to the first frame of the measurement,  $\Delta\text{Scattering}(t) = I_{xy}(t) - I_{xy}(t=0)$ . Note the blinking particles during the catalytically active time period. For reference cf. Figures 5 & 6d.
